# Supplementary material
Source: PubMed Central journal article supplement (PMC4751783)
Supplement: JB.00705-15_zjb999093864so1.pdf [file JB.00705-15_zjb999093864so1.pdf]

SUPPLEMENTAL MATERIALS

SUPPLEMENTAL FIGURES

Figure S1

**A**

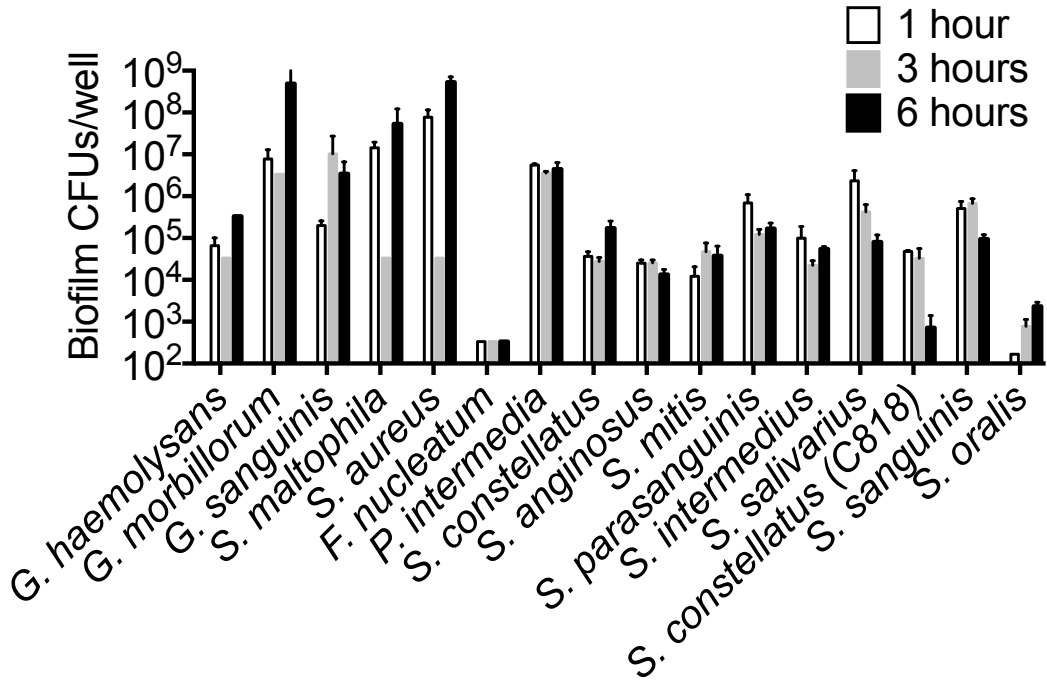

**B**

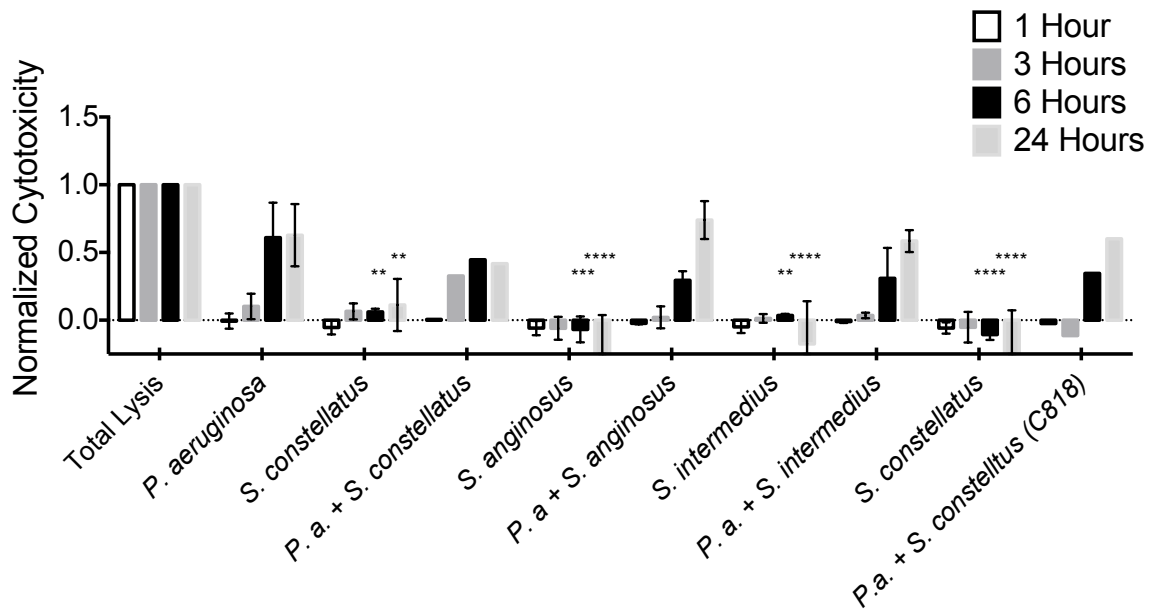

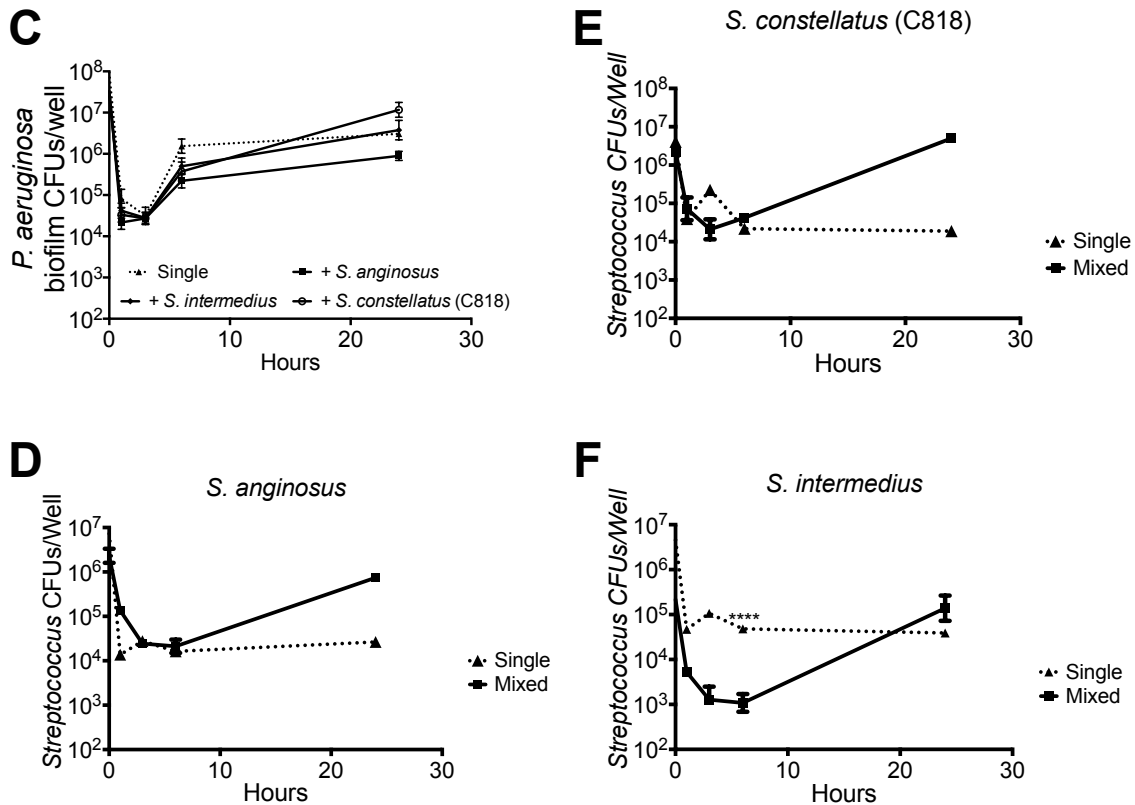

**Figure S1. Growth kinetics and cytotoxicity of CF-relevant bacteria grown as biofilms on CFBE cells.** A) Viability of bacteria grown as single species biofilms on CFBE cells at one (white columns), three (gray columns) and six hours (black columns) post inoculation. Columns are the mean of at least three biological replicates, error bars indicate the standard deviation. B) Cytotoxicity of *P. aeruginosa*, *S. anginosus*, *S. intermedius*, *S. constellatus*, as indicated grown as single species biofilms or mixed biofilms with *P. aeruginosa*, as indicated on CFBE cells at one (white columns), three (dark gray columns), six hours (black columns) and twenty-four hours (light gray columns) post inoculation. Cytotoxicity was measured as percentage of LDH release compared to total lysis control of uninfected CF airway cells treated with Triton X-100 detergent to completely lyse cells and release all intracellular LDH using the Cyto Tox 96 Non-radioactive Cytotoxicity Kit (Promega) according to the manufacture's instructions. Columns are the mean of at least two biological replicates, error bars indicate the standard deviation. \*\*, \*\*\*, \*\*\*\* indicates  $P < 0.01$ ,  $< 0.001$ ,  $< 0.0001$ , respectively compared to *P. aeruginosa* alone at each time point, determined by two-way ANOVA followed by Dunnett's test for multiple comparisons. C) Viability of *P. aeruginosa* grown as single species biofilms on CFBE cells (dashed line); Viability of *P. aeruginosa* grown as mixed biofilms on CFBE cells with *S. anginosus*, *S. intermedius*, *S. constellatus*, as indicated (solid line). Symbols, mean of three biological replicates; error bars, SD. D-F) Viability of indicated *Streptococcus* species grown as single biofilms on CFBE cells (dashed line); Viability of indicated *Streptococcus* species grown as mixed biofilms on CFBE cells with *P. aeruginosa* (solid line). Symbols, mean of three biological replicates; error bars, SD. The difference between *P. aeruginosa* and *S. intermedius* at  $t = 6$  hrs is significant; no other differences are significant (unpaired T-test,  $P < 0.05$ ). For the

studies in this figure, *Gemella haemolysans*, *Gemella morbillorum*, *Gemella sanguinis*, *Streptococcus anginosus*, *Streptococcus constellatus*, *Streptococcus constellatus*, *Streptococcus intermedius*, *Streptococcus mitis*, *Streptococcus oralis*, *Streptococcus parasanguinis*, *Streptococcus salivarius*, *Streptococcus sanguinis* were grown on blood agar and Todd Hewitt broth supplemented with 0.5% yeast extract (THY) and 20  $\mu\text{L}/\text{mL}$  oxyrase (Oxyrase, Inc.) statically at 37°C in a 5% CO<sub>2</sub> atmosphere. *Fusobacterium nucleatum* and *Prevotella intermedia* were grown on blood agar, incubated anaerobically in GasPak jars and in Todd Hewitt broth supplemented with 0.5% yeast extract (THY) and 20  $\mu\text{L}/\text{mL}$  oxyrase (Oxyrase, Inc.) statically at 37°C in a 5% CO<sub>2</sub> atmosphere. *Staphylococcus aureus*, *Staphylococcus epidermidis* were grown on blood agar and Todd Hewitt broth supplemented with 0.5% yeast extract (THY) without the addition of oxyrase (Oxyrase, Inc.) shaking at 37°C. *Stenotrophomonas maltophilia* was grown on LB agar or liquid shaking at 37°C.

Figure S2

**A**

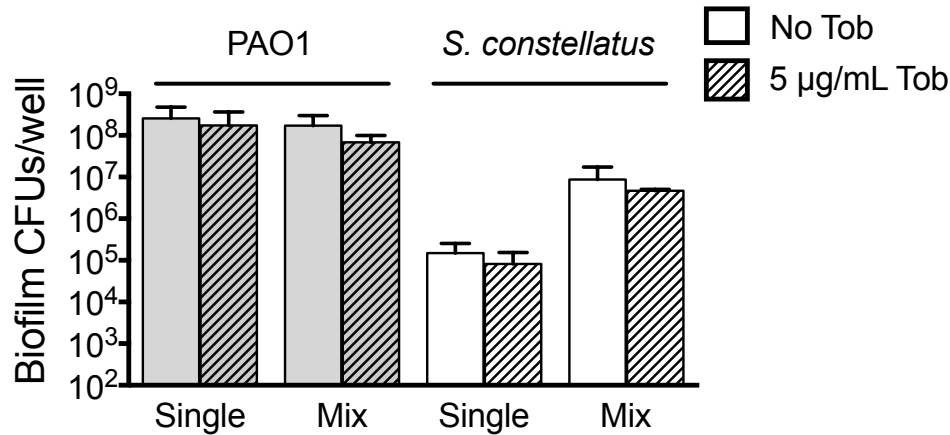

**B**

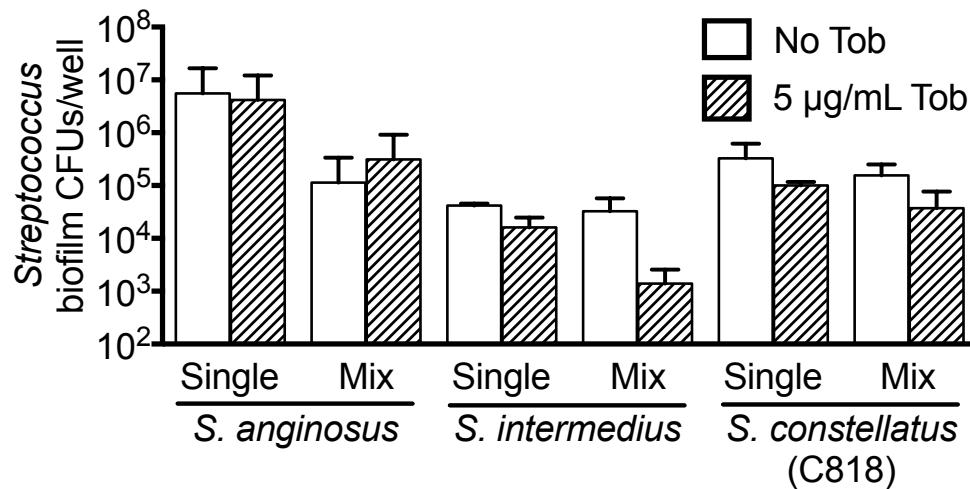

**Figure S2. Strain specificity of tobramycin enhancement of *S. constellatus* growing in a biofilms.** A) Viability of bacteria grown as biofilms on CF airway cells from assays of single or mixed biofilms of *P. aeruginosa* strain PAO1 (gray columns) and *S. constellatus* 7155 (white columns) treated with no tobramycin (open columns) or with 5 µg/mL of tobramycin (hatched columns). There were no significant changes in CFUs in single versus mixed communities ( $P > 0.05$ ). B) Viability (CFUs/well) of *Streptococcus* grown as biofilms on CFBE cells from assays of single or mixed biofilms of *S. anginosus*, *S. intermedius* or *S. constellatus* strain C818 with *P. aeruginosa* PA14, as indicated treated with MEM (open columns) or with 5 µg/mL of tobramycin (hatched columns). Columns and error bars indicate the mean and S.D. of at least two biological replicates. There were no significant changes in CFUs in single versus mixed communities, in the presence or absence of tobramycin ( $P > 0.05$ ).

**Supplemental Table S1. Bacterial strains used in this study.**

| <i>P. aeruginosa</i> strains | SMC strain number or location in non-redundant library | Relevant genotype                                                                                        | Source     |
|------------------------------|--------------------------------------------------------|----------------------------------------------------------------------------------------------------------|------------|
| PA14                         | 232                                                    | Wild-type PA14                                                                                           | (1)        |
| PA14 GFP                     | 241                                                    | PA14, pSMC21-GFP, Amp <sup>R</sup> constitutively active GFP                                             |            |
| <i>algR</i>                  | 12_1 D1                                                | <i>algR::Tn</i> , Gent <sup>R</sup>                                                                      | (2)        |
| <i>algU</i>                  | 1255                                                   | <i>algU::Tn5phoA</i> , Kn <sup>R</sup>                                                                   | D. Hogan   |
| <i>betB</i>                  | 13_3 C10                                               | <i>betB::Tn</i> , Gent <sup>R</sup>                                                                      | (2)        |
| <i>betI</i>                  | 10_3 G8                                                | <i>betI::Tn</i> , Gent <sup>R</sup>                                                                      | (2)        |
| <i>bifA</i>                  | 3351                                                   | $\Delta$ <i>bifA</i>                                                                                     | (3)        |
| <i>bkdR</i>                  | 11_4 E11                                               | <i>bkdR::Tn</i> , Gent <sup>R</sup>                                                                      | (2)        |
| <i>creB</i>                  | 09_2 C6                                                | <i>creB::Tn</i> , Gent <sup>R</sup>                                                                      | (2)        |
| <i>fptA</i>                  | 09_4 D5                                                | <i>fptA::Tn</i> , Gent <sup>R</sup>                                                                      | (2)        |
| <i>fpvA</i>                  | 10_4 H1                                                | <i>fpvA::Tn</i> , Gent <sup>R</sup>                                                                      | (2)        |
| <i>gntR</i>                  | 04_4 G10                                               | <i>gntR::Tn</i> , Gent <sup>R</sup>                                                                      | (2)        |
| <i>hcnA</i>                  | 10_2 F12                                               | <i>hcnA::Tn</i> , Gent <sup>R</sup>                                                                      | (2)        |
| <i>hcnB</i>                  | 09_3 A10                                               | <i>hcnB::Tn</i> , Gent <sup>R</sup>                                                                      | (2)        |
| <i>hcnC</i>                  | 15_1 A4                                                | <i>hcnC::Tn</i> , Gent <sup>R</sup>                                                                      | (2)        |
| <i>lasB</i>                  | 05_2 F6                                                | <i>lasB::Tn</i> , Gent <sup>R</sup>                                                                      | (2)        |
| <i>lasR</i>                  | 5021                                                   | $\Delta$ <i>lasR</i>                                                                                     | (4)        |
| <i>lasRrhlR</i>              | 5023                                                   | <i>AlasR</i> , <i>rhlR::tet<sup>R</sup></i> Tet <sup>R</sup>                                             | (5)        |
| <i>metR</i>                  | 12_1 F10                                               | <i>metR::Tn</i> , Gent <sup>R</sup>                                                                      | (2)        |
| <i>mgtE</i>                  | 4349                                                   | $\Delta$ <i>mgtE</i> , pMQ70, Amp <sup>R</sup>                                                           | (6)        |
| <i>np20</i>                  | 10_3 C3                                                | <i>np20::Tn</i> , Gent <sup>R</sup>                                                                      | (2)        |
| <i>nvdB</i>                  | 1759                                                   | $\Delta$ <i>nvdB</i>                                                                                     | (7)        |
| <i>pelA</i>                  | 2893                                                   | <i>pelA</i>                                                                                              | (8)        |
| <i>phnAB</i>                 | 5019                                                   | $\Delta$ <i>phnAB</i>                                                                                    | D. Hogan   |
| <i>phoB</i>                  | 4162                                                   | <i>phoB</i> , Gent <sup>R</sup>                                                                          | This study |
| <i>phz 1/2</i>               | 4189                                                   | $\Delta$ <i>phzA1-G1</i> , $\Delta$ <i>phzA2-G2</i> , pYFP                                               | (9)        |
| <i>phz1/pvdApchE</i>         | 4191                                                   | $\Delta$ <i>phzA1-G1</i> , $\Delta$ <i>phzA2-G2</i> , $\Delta$ <i>pvdA</i> , $\Delta$ <i>pchE</i> , pYFP | (9)        |
| <i>phzA1-G1 A2-G2</i>        | 5020                                                   | $\Delta$ <i>phzA1-G1</i> , $\Delta$ <i>phzA2-G2</i>                                                      | (10)       |
| <i>pqsA</i>                  | 5013                                                   | $\Delta$ <i>pqsA</i>                                                                                     | D. Hogan   |
| <i>pqsE</i>                  | 5016                                                   | $\Delta$ <i>pqsE</i>                                                                                     | (10)       |
| <i>pqsH</i>                  | 5017                                                   | $\Delta$ <i>pqsH</i>                                                                                     | (5)        |
| <i>pqsR</i>                  | 5018                                                   | $\Delta$ <i>pqsR</i>                                                                                     | (5)        |
| <i>pvdA/pchE</i>             | 4190                                                   | $\Delta$ <i>pvdA</i> , $\Delta$ <i>pchE</i> pYFP                                                         | (9)        |
| <i>pvdS</i>                  | 06_2 G5                                                | <i>pvdS::Tn</i> , Gent <sup>R</sup>                                                                      | (2)        |

|                                     |                          |                                             |               |
|-------------------------------------|--------------------------|---------------------------------------------|---------------|
| <i>rhlA</i>                         | 1353                     | <i>rhlA::Gm</i> , Gent <sup>R</sup>         | (11)          |
| <i>rhlB</i>                         | 2758                     | <i>rhlB::kn</i> , Kn <sup>R</sup>           | (12)          |
| <i>rhlC</i>                         | 2759                     | $\Delta$ <i>rhlC</i>                        | (12)          |
| <i>rhlR</i>                         | 5022                     | <i>rhlR::tet</i> , Tet <sup>R</sup>         | (13)          |
| <i>roeA</i>                         | 3812                     | $\Delta$ <i>roeA</i>                        | (14)          |
| <i>rpoS</i>                         | 05_3 A2                  | <i>rpoS::Tn</i> , Gent <sup>R</sup>         | (2)           |
| <i>sadB</i>                         | 705                      | <i>sadB::Tn5B21</i> , Tet <sup>R</sup>      | (15)          |
| <i>sadC</i>                         | 3335                     | $\Delta$ <i>sadC</i>                        | (16)          |
| <i>sadCroeA</i>                     | 3809                     | $\Delta$ <i>sadC</i> , $\Delta$ <i>roeA</i> | (14)          |
| <i>spuF</i>                         | 11_3 F1                  | <i>spuF::Tn</i> , gent <sup>R</sup>         | (2)           |
| <b>Other strains</b>                | <b>SMC strain number</b> | <b>Strain</b>                               | <b>Source</b> |
| <i>Fusobacterium nucleatum</i>      | 5370                     | ATCC# 42956                                 | ATCC          |
| <i>Gemella haemolysans</i>          | 5359                     | ATCC# 10379                                 | ATCC          |
| <i>Gemella morbillorum</i>          | 5358                     | ATCC# 27824                                 | ATCC          |
| <i>Gemella sanguinis</i>            | 5386                     | ATCC# 700632                                | ATCC          |
| <i>Prevotella intermedia</i>        | 4804                     | ATCC# 25611                                 | ATCC          |
| <i>Staphylococcus aureus</i>        | 643                      | Newman                                      | A. Cheung     |
| <i>Staphylococcus epidermidis</i>   | 380                      | ATCC# R97-03                                | ATCC          |
| <i>Staphylococcus epidermidis</i>   | 381                      | ATCC# R94-10                                | ATCC          |
| <i>Stenotrophomonas maltophilia</i> | 4920                     | K279a                                       | R. Ryan       |
| <i>Streptococcus anginosus</i>      | 5342                     | C238                                        | M.G. Surette  |
| <i>Streptococcus constellatus</i>   | 7155                     | Clinical isolate designated strain 7155     | N. Jacobs     |
| <i>Streptococcus constellatus</i>   | 5343                     | C818                                        | M.G. Surette  |
| <i>Streptococcus intermedius</i>    | 7156                     | Clinical isolate                            | N. Jacobs     |
| <i>Streptococcus mitis</i>          | 7157                     | Clinical isolate                            | N. Jacobs     |
| <i>Streptococcus oralis</i>         | 5355                     | ATCC# 35037                                 | ATCC          |
| <i>Streptococcus parasanguinis</i>  | 5357                     | ATCC# 15912                                 | ATCC          |
| <i>Streptococcus salivarius</i>     | 7158                     | Clinical isolate                            | N. Jacobs     |
| <i>Streptococcus sanguinis</i>      | 5356                     | ATCC# 10556                                 | ATCC          |

**Table S2. Candidate genes and phenotypes on plastic.**

| <i>P. aeruginosa</i> mutant | <i>S. constellatus</i> 7155 Viability <sup>a</sup> |             |
|-----------------------------|----------------------------------------------------|-------------|
|                             | 0 µg/mL Tob                                        | 5 µg/mL Tob |
| <i>algR</i>                 | WT                                                 | WT          |
| <i>algU</i>                 | WT                                                 | WT          |
| <i>betB</i>                 | WT                                                 | WT          |
| <i>betI</i>                 | WT                                                 | WT          |
| <i>bifA</i>                 | Low                                                | High        |
| <i>bkdR</i>                 | WT                                                 | WT          |
| <i>creB</i>                 | WT                                                 | WT          |
| <i>fptA</i>                 | WT                                                 | WT          |
| <i>fpvA</i>                 | WT                                                 | WT          |
| <i>gntR</i>                 | WT                                                 | WT          |
| <i>hcnA</i>                 | WT                                                 | WT          |
| <i>hcnB</i>                 | WT                                                 | WT          |
| <i>hcnC</i>                 | WT                                                 | WT          |
| <i>lasB</i>                 | WT                                                 | WT          |
| <i>lasR</i>                 | High                                               | WT          |
| <i>lasR/rhlR</i>            | WT                                                 | WT          |
| <i>metR</i>                 | WT                                                 | WT          |
| <i>mgtE</i>                 | WT                                                 | WT          |
| <i>np20</i>                 | WT                                                 | WT          |
| <i>nvdB</i>                 | WT                                                 | WT          |
| <i>pelA</i>                 | WT                                                 | WT          |
| <i>phnAB</i>                | WT                                                 | WT          |
| <i>phoB</i>                 | WT                                                 | WT          |
| <i>phz 1/2</i>              | WT                                                 | WT          |
| <i>phz1/pvdApchE</i>        | WT                                                 | WT          |
| <i>phzA1-G1 A2-G2</i>       | WT                                                 | WT          |
| <i>pqsA</i>                 | WT                                                 | WT          |
| <i>pqsE</i>                 | WT                                                 | WT          |
| <i>pqsH</i>                 | WT                                                 | WT          |
| <i>pqsR</i>                 | WT                                                 | WT          |
| <i>pvdA/pchE</i>            | WT                                                 | WT          |
| <i>pvdS</i>                 | WT                                                 | WT          |
| <i>rhlA</i>                 | High                                               | WT          |
| <i>rhlB</i>                 | High                                               | WT          |
| <i>rhlC</i>                 | WT                                                 | WT          |
| <i>rhlR</i>                 | High                                               | WT          |
| <i>roeA</i>                 | WT                                                 | WT          |

|                  |      |    |
|------------------|------|----|
| <i>rpoS</i>      | WT   | WT |
| <i>sadB</i>      | WT   | WT |
| <i>sadC</i>      | High | WT |
| <i>sadC/roeA</i> | WT   | WT |
| <i>spuF</i>      | WT   | WT |

<sup>a</sup>Viability of *S. constellatus* 7155 grown as mixed biofilms with the indicated strain of *P. aeruginosa* PA14 on plastic. “WT” indicates that the viability of *S. constellatus* 7155 was comparable to *S. constellatus* 7155 and wild-type *P. aeruginosa* PA14 mixed biofilms. “High” and “Low” indicate greater or lesser viability of *S. constellatus* 7155 grown as mixed biofilms with the indicated strain of *P. aeruginosa* on plastic, respectively.



## SUPPLEMENTAL MATERIAL REFERENCES

1. **Rahme LG, Stevens EJ, Wolfort SF, Shao J, Tompkins RG, Ausubel FM.** 1995. Common virulence factors for bacterial pathogenicity in plants and animals. *Science* **268**:1899-1902.
2. **Liberati NT, Urbach JM, Miyata S, Lee DG, Drenkard E, Wu G, Villanueva J, Wei T, Ausubel FM.** 2006. An ordered, nonredundant library of *Pseudomonas aeruginosa* strain PA14 transposon insertion mutants. *Proc Natl Acad Sci U S A* **103**:2833-2838.
3. **Kuchma SL, Brothers KM, Merritt JH, Liberati NT, Ausubel FM, O'Toole GA.** 2007. BifA, a cyclic-Di-GMP phosphodiesterase, inversely regulates biofilm formation and swarming motility by *Pseudomonas aeruginosa* PA14. *J Bacteriol* **189**:8165-8178.
4. **Hogan DA, Vik A, Kolter R.** 2004. A *Pseudomonas aeruginosa* quorum-sensing molecule influences *Candida albicans* morphology. *Mol Microbiol* **54**:1212-1223.
5. **Cugini C, Morales DK, Hogan DA.** 2010. *Candida albicans*-produced farnesol stimulates *Pseudomonas* quinolone signal production in LasR-defective *Pseudomonas aeruginosa* strains. *Microbiology* **156**:3096-3107.
6. **Anderson GG, Yahr TL, Lovewell RR, O'Toole GA.** 2010. The *Pseudomonas aeruginosa* magnesium transporter MgtE inhibits transcription of the type III secretion system. *Infect Immun* **78**:1239-1249.
7. **Mah TF, Pitts B, Pellock B, Walker GC, Stewart PS, O'Toole GA.** 2003. A genetic basis for *Pseudomonas aeruginosa* biofilm antibiotic resistance. *Nature* **426**:306-310.
8. **Friedman L, Kolter R.** 2004. Genes involved in matrix formation in *Pseudomonas aeruginosa* PA14 biofilms. *Mol Microbiol* **51**:675-690.
9. **Dietrich LE, Price-Whelan A, Petersen A, Whiteley M, Newman DK.** 2006. The phenazine pyocyanin is a terminal signalling factor in the quorum sensing network of *Pseudomonas aeruginosa*. *Mol Microbiol* **61**:1308-1321.
10. **Ha DG, Merritt JH, Hampton TH, Hodgkinson JT, Janecek M, Spring DR, Welch M, O'Toole GA.** 2011. 2-Heptyl-4-quinolone, a precursor of the *Pseudomonas* quinolone signal molecule, modulates swarming motility in *Pseudomonas aeruginosa*. *J Bacteriol* **193**:6770-6780.
11. **Pukatzki S, Kessin RH, Mekalanos JJ.** 2002. The human pathogen *Pseudomonas aeruginosa* utilizes conserved virulence pathways to infect the social amoeba *Dictyostelium discoideum*. *Proc Natl Acad Sci U S A* **99**:3159-3164.
12. **Caiazza NC, Shanks RM, O'Toole GA.** 2005. Rhamnolipids modulate swarming motility patterns of *Pseudomonas aeruginosa*. *J Bacteriol* **187**:7351-7361.
13. **Hogan DA, Kolter R.** 2002. *Pseudomonas-Candida* interactions: an ecological role for virulence factors. *Science* **296**:2229-2232.
14. **Merritt JH, Ha DG, Cowles KN, Lu W, Morales DK, Rabinowitz J, Gitai Z, O'Toole GA.** 2010. Specific control of *Pseudomonas aeruginosa* surface-

- associated behaviors by two c-di-GMP diguanylate cyclases. *MBio* **1**:pii: e00183-10.
15. **Caiazza NC, O'Toole GA.** 2004. SadB is required for the transition from reversible to irreversible attachment during biofilm formation by *Pseudomonas aeruginosa* PA14. *J Bacteriol* **186**:4476-4485.
  16. **Merritt JH, Brothers KM, Kuchma SL, O'Toole GA.** 2007. SadC reciprocally influences biofilm formation and swarming motility via modulation of exopolysaccharide production and flagellar function. *J Bacteriol* **189**:8154-8164.
